# Supplementary material for: Crosstalk in competing endogenous RNA network reveals the complex molecular mechanism underlying lung cancer
Source: PubMed Central journal article supplement (PMC5710922; doi:10.18632/oncotarget.20441), 2017-08-24
Supplement: oncotarget-08-91270-s001.pdf [file oncotarget-08-91270-s001.pdf]

## **Crosstalk in competing endogenous RNA network reveals the complex molecular mechanism underlying lung cancer**

### **SUPPLEMENTARY MATERIALS**

**Supplementary Table 1: The basic information of subjects included in RNA-seq analyses.**

**See Supplementary File 1**
